# Supplementary material for: HIF-1alpha Deficiency Attenuates the Cardiomyogenesis of Mouse Embryonic Stem Cells
Source: PLOS journal article supplement (doi:10.1371/journal.pone.0158358), 2016-06-29

# Supporting information

**Figure S2:** The representative figures showing the analysis of 5+15d mESC-CMs beating performed by the CBAlyser.

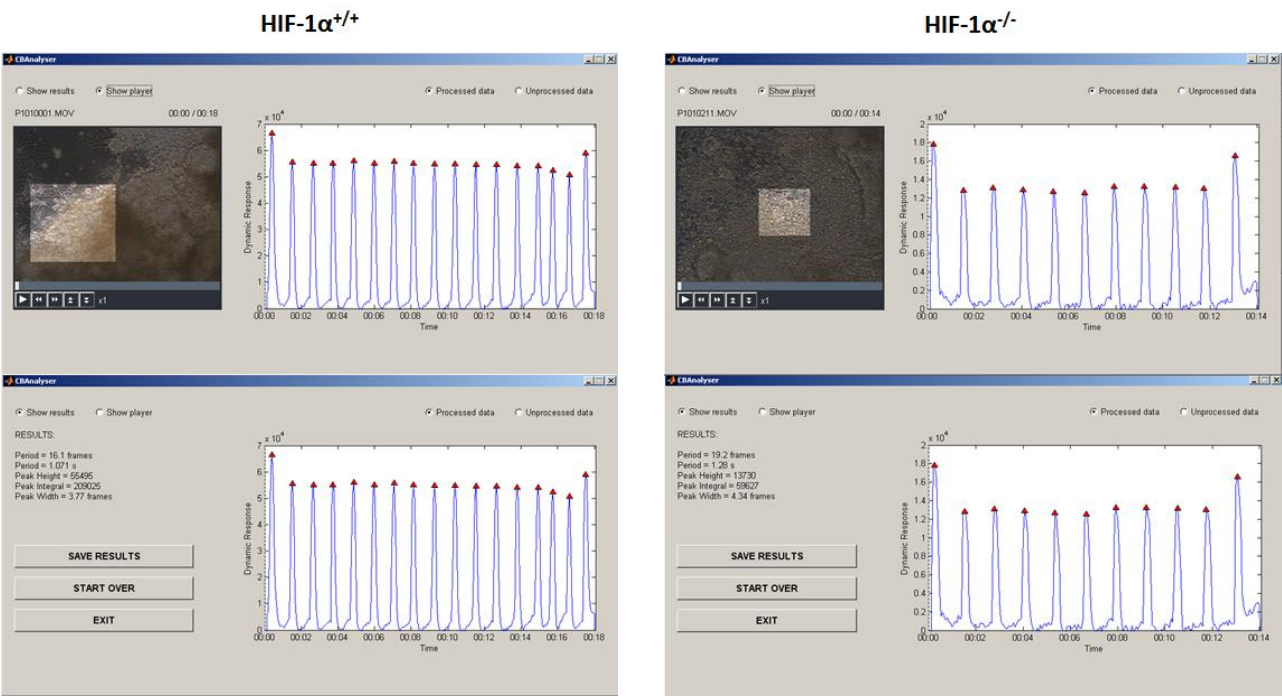

Supplement: S2 (10.1371/journal.pone.0158358.s002) [file journal.pone.0158358.s002]
